# Supplementary material
Source: Springer Nature journal article supplement (https://www.springermedizin.de/resource/supplementary/12985_2013_2159_MOESM4_ESM.pdf/9606190)

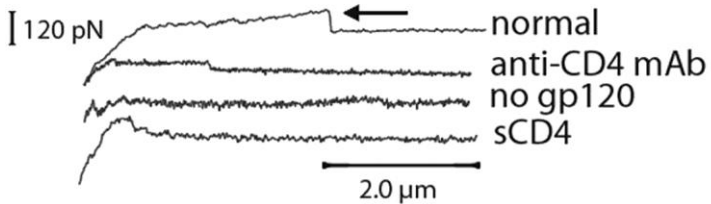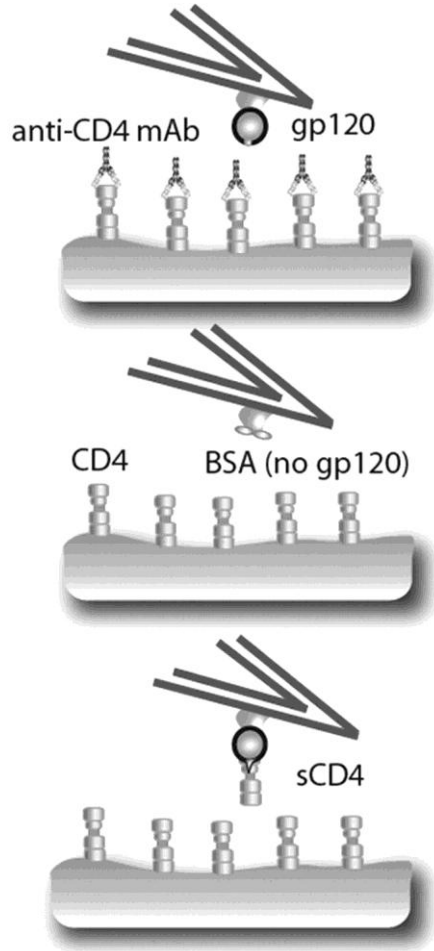

Supplement: MOESM4 [file 9606190]
